# Supplementary material for: PD-L1 Antibodies to Its Cytoplasmic Domain Most Clearly Delineate Cell Membranes in Immunohistochemical Staining of Tumor Cells
Source: Oxford University Press journal article supplement (doi:10.1158/2326-6066.cir-15-0116), 2015-11-06
Supplement: 23266066cir150116-sup-148794_2_supp_3113474_ntgdgk.docx [file 23266066cir150116-sup-148794_2_supp_3113474_ntgdgk.docx]

|  |  |  | **PD-L1 staining on malignant cells** | | | **PD-L1 staining on non-malignant immune cells** | | | **PD-L1 staining in ECM** |
| --- | --- | --- | --- | --- | --- | --- | --- | --- | --- |
| **Tumor Type** | **mAb Clone** | **% malignant cells of total cellularity** | **Cytoplasmic vs Membrane vs Nuclear (major/minor pattern)** | **% malignant cells with Positive staining** | **Intensity of positive staining**  **(1-3+)** | **Cytoplasmic vs Membrane vs Nuclear  (major/minor pattern)** | **% NON-malignant immune cells with positive staining** | **Intensity of positive staining  (1-3+)** | **Intensity of staining (0-3+)** |
| cHL | 9A11 | 5 | M | 100 | 3 | M | 20 | 2 | 0 |
| cHL | SP142 | 5 | M | 90 | 3 | M/C | 20 | 1 | 0 |
| cHL | E1L3N | 5 | M | 100 | 3 | M | 30 | 3 | 0 |
| cHL | 7G11 | 5 | C/M | 90 | 3 | C | 90 | 2 | 0 |
| cHL | 015 | 5 | C/M | 100 | 3 | C | 20 | 2 | 1 |
| NPC | 9A11 | 20 | M | 100 | 3 | M | 10 | 2 | 0 |
| NPC | SP142 | 20 | M | 90 | 3 | M/C | 20 | 2 | 0 |
| NPC | E1L3N | 20 | M | 100 | 3 | M | 20 | 3 | 0 |
| NPC | 7G11 | 20 | C/M | 100 | 3 | C | 50 | 2 | 0 |
| NPC | 015 | 20 | M/C | 100 | 3 | C | 90 | 2 | 1 |
| RCC | 9A11 | 70 | M | 20 | 2 | C | <5 | 1 | 0 |
| RCC | SP142 | 70 | M | 5 | 2 | C | <5 | 1 | 0 |
| RCC | E1L3N | 70 | M | 50 | 3 | C | <5 | 1 | 0 |
| RCC | 7G11 | 70 | M | 20 | 2 | C | 10 | 1 | 0 |
| RCC | 015 | 70 | C/M | 90 | 2 | C | 90 | 2 | 1 |
| NSCLC | 9A11 | 30 | M | 15 | 3 | C | <5 | 1 | 0 |
| NSCLC | SP142 | 30 | M | 10 | 3 | C | <5 | 1 | 0 |
| NSCLC | E1L3N | 30 | M | 20 | 3 | C | <5 | 1 | 0 |
| NSCLC | 7G11 | 30 | C/M | 90 | 2 | C | 90 | 2 | 1 |
| NSCLC | 015 | 30 | C | 90 | 1 | C | 90 | 1 | 1 |
| DLBCL | 9A11 | 70 | 0 | 0 | 0 | 0 | 0 | 0 | 0 |
| DLBCL | SP142 | 70 | 0 | 0 | 0 | M | <5 | 1 | 0 |
| DLBCL | E1L3N | 70 | 0 | 0 | 0 | M | <5 | 1 | 0 |
| DLBCL | 7G11 | 70 | C | 10 | 1 | 0 | 0 | 0 | 0 |
| DLBCL | 015 | 70 | C | 80 | 2 | C | 90 | 2 | 1 |
